# Supplementary material
Source: Research Square preprint supplement (doi:10.21203/rs.3.rs-8987163/v1)
Supplement: Supplementary file 2 [file 39e36ae72e873226dd97d2d0.docx]

**Invasive *Streptococcus agalactiae* Infections in Infants in Guangzhou, Southern China (2013-2022): Molecular Epidemiology and Clinical Management Implications**

Xiao-lan Chen1#, Hua-min Zhong1#, Yong-qiang Xie1#, Wen-shan Chen1, Li-Jia Wei1, Kan-kan Gao1, Bing-shao Liang1, Su-fei Zhu1, Yun-feng Liu1, Fei Gao1, Yan Long1*, Lian-fen Huang1*

1Department of Laboratory Medicine, Guangzhou Medical University Affiliated Women and Children’s Medical Center, Guangdong Provincial Clinical Research Center for Laboratory Medicine, Guangzhou, China;

*Corresponding author: hlfen2008@163.com (Lian-fen Huang), [Longyangmc@163.com](mailto:Longyangmc@163.com) (Yan Long)

#These authors contributed equally to this study.

**Abstract** Group B Streptococcus (GBS, *Streptococcus agalactiae*) remains a leading cause of invasive infections in infants worldwide, despite the widespread implementation of intrapartum antibiotic prophylaxis (IAP). This study aimed to clarify the molecular and clinical characteristics of invasive GBS isolates from infants in Guangzhou, China (2013–2022). A total of 131 GBS strains were collected from blood cultures (n=98) and cerebrospinal fluid cultures (n=33) of infants aged ≤90 days. All isolates underwent capsular serotyping, multilocus sequence typing (MLST), virulence gene profiling (including *CylE*, *HylB*, Alp family genes, and pilus islands genes), and antimicrobial susceptibility testing. Of the 131 GBS isolates, 37 (28.2%) caused early-onset disease (EOD) and 94 (71.8%) caused late-onset disease (LOD). The hypervirulent III/ST17 clone was the predominant lineage (56.5%) and was associated with LOD. Serotype Ia accounted for 15.3% of all isolates and was correlated with respiratory distress in EOD cases. All isolates carried the *CylE* and *HylB* toxin genes, with *Rib* being the most prevalent surface protein gene (71.8%). *PI-2b* (67.9%) was the major pilus island and was exclusively detected in serotype III/CC17 strains. Resistance rates to clindamycin, erythromycin, and tetracycline exceeded 80%, while all isolates remained susceptible to penicillin and ampicillin.This study confirms that the III/ST17 clone is the primary driver of GBS LOD and identifies an association between serotype Ia and respiratory distress in GBS EOD. It further underscores the value of continuous molecular surveillance for guiding targeted prevention strategies and optimizing clinical management of invasive GBS disease in infants.

**Keywords:** Group B *Streptococcus*; Infants; ST17; serotype Ⅰa; Disease Management; Molecular epidemiology

1. **Introduction**

*Streptococcus agalactiae* (Group B *Streptococcus*, GBS) is .is a Gram-positive coccus and a common commensal of the female lower genital tract and rectum. It is also a major pathogen responsible for neonatal sepsis, meningitis, and pneumonia worldwide, often leading to severe outcomes such as neurological sequelae and neonatal death [1]. Clinically, invasive GBS infections in infants are classified into two distinct syndromes: early-onset disease (EOD), occurring within 0-6 days of life, and late-onset disease (LOD), occurring within 7-89 days of life. Multicenter clinical and molecular epidemiological analyses in China have reported an incidence of 0.31 cases of invasive GBS disease per 1000 live births, with a mortality rate of 2.3% [2]. Although intrapartum antibiotic prophylaxis (IAP) has markedly reduced the incidence of EOD in many high-income countries, GBS continues to pose a substantial clinical burden, largely due to the limited efficacy of IAP against LOD [3].

GBS encodes a diverse array of virulence factors [4], including pilus islands (PI), which play a pivotal role in biofilm formation [5]—a mechanism that may enable GBS to evade IAP. The Alp family of surface proteins mediate endothelial adhesion and represent promising targets for protein-based vaccines [6]. Meanwhile, the potent toxins hemolysin and hyaluronidase, encoded by the *cylE* and *hylB* genes, respectively, induce host cell damage and facilitate placental barrier invasion [7, 8]. However, comprehensive analyses integrating the distribution of these key virulence factors in clinical GBS isolates remain limited.

Molecular characterization is essential for elucidating the epidemiology and pathogenesis of GBS. Traditional capsular serotyping, based on capsular polysaccharide (CPS) antibodies, is still widely used [9] but has limitations for isolates with low or absent capsule expression. Geno-serotyping, which combines latex agglutination with PCR-based capsular gene detection, has been developed to address this shortcoming and enable more accurate characterization [10, 11]. Multilocus sequence typing (MLST) has been a common method for defining GBS genetic lineages since 2003 [12]. Accumulating evidence has demonstrated that distinct GBS sequence types (STs) and clonal complexes (CCs) exhibit marked differences in pathogenic potential, epidemiological patterns, and antibiotic resistance profiles [13, 14]. Our previous work confirmed the dominance of the hypervirulent III/ST17 lineage in China, as well as its association with the meningeal tropism gene hvgA and major resistance genes [15]. Other studies have further correlated specific STs with unique resistance profiles: ST17 is frequently tetracycline-resistant but levofloxacin-susceptible, whereas ST19 shows the opposite pattern [16]; ST10 is associated with high radezolid minimum inhibitory concentrations (MICs) and fluoroquinolone resistance [17, 18]; and the III/ST19 and Ib/ST10 lineages have been identified as key multidrug-resistant clones among fluoroquinolone-resistant GBS strains in China [19].

Despite these advances, longitudinal epidemiological analyses of invasive GBS isolates from infants remain insufficient. In this study, we conducted a ten-year (2013–2022) retrospective molecular epidemiological investigation of invasive GBS isolates from infants aged ≤90 days in Guangzhou to characterize the distribution of serotypes, STs, and ten key virulence genes—including three pilus islands (*PI-1*, *PI-2a*, and *PI-2b*); five Alp family surface proteins (*alphaC*, *Alp1*, *Alp2*/3, and *Alp4*); and two toxin genes (*cylE* and *hylB*). This characterization may help inform more targeted GBS prevention strategies and enhance the clinical management of invasive GBS disease in infants.

1. **Materials and Methods**

**2.1 Bacterial Isolates and Ethical Approval**

All GBS isolates were collected from blood cultures (n=98) and cerebrospinal fluid (CSF) cultures (n=33) of infants aged ≤90 days who were hospitalized at Guangzhou Medical University Affiliated Women and Children’s Medical Center during 2013-2022. Species identification was confirmed using Matrix-Assisted Laser Desorption/Ionization Time-of-Flight Mass Spectrometry (MALDI-TOF MS). Relavant clinical data were obtained from the hospital’s electronic medical records. The study protocol was approved by the Institutional Ethics Committee of the hospital (approval no 2025120A01).

**2.2 Capsular Serotyping and MLST**

Molecular CPS serotyping was performed using a validated multiplex PCR assay and serum agglutination method [11]. Genomic DNA was extracted from GBS isolates using the SteadyPure Bacterial Genomic DNA Extraction Kit (Realy Biotechnology, China) following the manufacturer’s protocol for Gram-positive bacteria. MLST was performed by sequencing seven housekeeping genes (*adhP*, *pheS*, *atr*, *glnA*, *sdhA*, *glcK*, *tkt*), and allele profiles, STs, and CCs were assigned by querying the PubMLST database (https://pubmlst.org/organisms/streptococcus-agalactiae/primers).

**2.3 Virulence Genes Detection**

PCR or multiplex PCR assays were used to detected the presence of three pilus island genes (*PI-1, PI-2a*, and *PI-2b*), five Alp family surface protein genes (*Rib*, *AlphaC*, *Alp1*, *Alp2*/3, and *Alp4*), and two toxin genes (*CylE* and *HylB*) [20].

**2.4 Antimicrobial Susceptibility Testing**

The MICs of 13 antibiotics (penicillin, ampicillin, ciprofloxacin, levofloxacin, moxifloxacin, linezolid, clindamycin, quinupristin/dalfopristin, erythromycin, vancomycin, tetracycline, nitrofurantoin, and tigecycline) were determined using VITEK 2 COMPACT microbiology systems (BioMérieux, Marcy-l’Étoile, France). Antimicrobial susceptibility interpretations were based on the 2020 edition of the Clinical and Laboratory Standards Institute (CLSI) criteria. The double-disk agar diffusion test (D-test) was used to detect the inducible macrolide–lincosamide–streptogramin B (iMLSB) phenotype. Multidrug resistance (MDR) was defined as resistance to at least three classes of antimicrobial agents.

**2.5 Statistical analyses**

Categorical data were presented as numbers and percentages. Group comparisons of categorical variables were performed using the chi-square test or Fisher’s exact test (two-tailed), with a P value ≤ 0.05 considered statistically significant. All statistical analyses were conducted using SPSS software (version 26.0; IBM Corp., Armonk, NY, USA). A minimum spanning tree was generated using PHYLOVIZ version 2.0 to visualize the genetic relationships between serotypes, STs, and CCs.

1. **Results**

**3.1 Epidemiology of Invasive GBS Infections**

Between 2013 and 2022, a total of 48,264 blood or cerebrospinal fluid cultures were performed on hospitalized infants (≤90 days) at the study center, of which 137 (2.8%) were positive for GBS. Six isolates were excluded due to unsuccessful preservation, resulting in a final study cohort of 131 GBS isolates. The clinical and demographic characteristics of infants with EOD and LOD are summarized in **Table 1** and **Fig. 1**. Of the 131 isolates, 37 (28.2%) caused EOD and 94 (71.8%) caused LOD. The main clinical manifestations of EOD were septicemia (35.1%, 13/37) and respiratory distress (32.4%, 12/37), while LOD was primarily characterized by septicemia (34.0%, 32/94) and meningitis (33.0%, 31/94). Other clinical symptoms included pneumonia (13.7%, 18/131), respiratory distress (9.9%, 13/131), pathological jaundice (7.6%, 10/131), and focal infections (bones, joints, soft tissues; 2.3%, 3/131). The mortality rate was higher in EOD patients (8.6%, 3/37) than in LOD patients (2.8%, 2/94). Notably, 80% of fatal cases (n=5, P<0.01) involved low birthweight infants (<2500 g).

Prenatal GBS screening results were available for 14 mothers: the colonization rate was higher in mothers of infants with EOD (50.0%, 4/8) than in those of infants with LOD (33.3%, 2/6), although this difference was not statistically significant, likely due to the limited sample size. Among GBS-colonized mothers, only one mother of an infant with EOD received IAP. One LOD case occurred in an infant born via in vitro fertilization, whose mother had a history of recurrent miscarriage (G8P3, with recurrent pregnancy loss from G2 to G6). Overall, 8.4% (11/131) of the mothers had a history of adverse pregnancy outcomes (e.g., spontaneous abortion or fetal demise). Additionally, one infant with LOD sepsis had an older sibling with a history of GBS meningitis. Among LOD cases with meningitis, three infants developed long-term sequelae following treatment, including focal epilepsy, speech delay, and autism spectrum disorder.

**Table 1.** Characteristics of Group B Streptococcus isolates from infants Aged ≤ 90 days, by Disease Onset. EOD, early-onset disease (0-6 days); LOD, late-onset disease (7-89 days); IQR, interquartile range; ST, sequence type.

|  | EOD (n=37) |  | LOD(n=94) |  |  | ST17(n=74) |  |
| --- | --- | --- | --- | --- | --- | --- | --- |
|  | Values | NA | Values | NA | P | Values | NA |
| Age at time of onset (days), median (IQR) | 1 (1-1) | 0 | 24.5 (16-45.75) | 0 | - | 19.5(10.25-31) | 0 |
| Male/Female ratio | 23:14 (1.64) | 0 | 42:52 (0.81) | 0 | >0.05 | 36:38 (0.95) | 0 |
| Birthweight (g), median (IQR) | 3060 (2780-3445) | 2 | 3100 (2712.5-3475) | 20 | - | 3020 (2735-3470) | 15 |
| Low birthweight (<2500 g), n (%) | 6 (17) | - | 12 (16） | - | >0.05 | 9 (15) | - |
| Length of hospital stay (days), Median (IQR) | 17 (13-24) | 8 | 32.5 (16.75-52) | 30 | - | 27 (16-43) | 21 |
| Mortality (n,%) | 3 (9) | 2 | 2 (3) | 23 | >0.05 | 3 (5) | 15 |
| Preterm birth (<37 weeks), n (%) | 6 (17) | - | 13 (19) | - | >0.05 | 11 (19) | - |
| Premature Rupture of Membranes, n (%) | 12 (34) | 2 | 6 (8) | 23 | 0.002 | 7 (12) | 16 |
| Delivery mode (n), Vaginal/C-section ratio | 21:12 (1.75) | 4 | 48:23 (2.09) | 23 | >0.05 | 35:20 (1.75) | 19 |
| Pregnancy type, n (%), first-time | 15 (43) | 2 | 27 (38) | 23 | >0.05 | 22 (38) | 16 |
| GBS antenatal screening, n (%) | 8 (23) | 2 | 6 (8) | 23 | 0.041 | 7 (12) | 16 |
| Positive GBS antenatal screening, n (%) | 4 (50) | 29 | 2 (33) | 88 | >0.05 | 3 (43) | 66 |
| Maternal prenatal fever, n (%) | 3 (9) | 2 | 2 (3) | 23 | >0.05 | 3 (5) | 15 |
| History of Adverse pregnancy outcomes, n (%) | 6 (17) | 2 | 5 (7) | 23 | >0.05 | 5 (8) | 15 |

Note: a history of adverse pregnancy indicates that the mother of the infant has experienced fetal demise or spontaneous abortion.

**

**

**Fig. 1**. (A) Distribution of infants’ source departments. All EOD infants and 58.5% (n=55) of LOD infants were admitted to the intensive care unit (PICU/ICU) or newborn department (including NICU), and the remaining LOD patients were from the observation unit (n=17), emergency department (n=14), cranial surgery (n=5), infectious diseases department (n=2), and orthopedics department (n=1). (B) Comparative distribution patterns of serotype and diseases between EOD and LOD groups. EOD: early-onset disease (0-6 days); LOD: late-onset disease (7-89 days).

**3.2 Antimicrobial Susceptibility Profiles of Invasive GBS Isolates**

All 131 isolates were fully susceptible to penicillin, ampicillin, linezolid, quinupristin/dalfopristin, and vancomycin. The detailed antimicrobial susceptibility profiles for other agents are presented in **Table S1**. High resistance rates were observed for tetracycline (94.1%, 95/101), erythromycin (87.8%, 79/90), and clindamycin (80.4%, 82/102). Temporal trends in resistance to seven non-pan-susceptible antibiotics are depicted in **Fig. 2**. Resistance to ciprofloxacin, levofloxacin, and moxifloxacin was primarily associated with the ST19 lineage (P<0.01; **Fig. S1**).


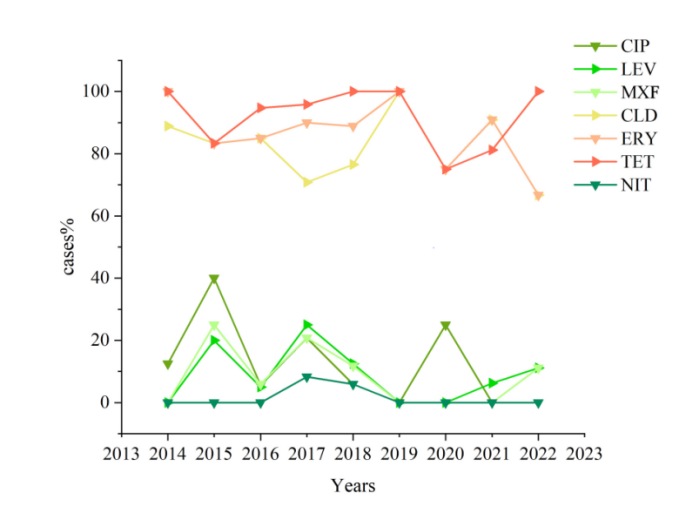


**Fig. 2.** Temporal trends in antimicrobial resistance among seven non-pan-susceptible antibiotics (2014–2022). CIP, ciprofloxacin; LEV, levofloxacin; MXF, moxifloxacin; CLI, clindamycin; ERY, erythromycin; TET, tetracycline; NIT, nitrofurantoin.

**3.3 Capsular Serotyping of Invasive GBS Isolates**

For capsular serotyping, four capsular serotypes (Ⅰa, Ⅰb, Ⅲ, and Ⅴ) were identified among the 131 isolates. The distribution of serotypes, CCs, and STs is shown in **Fig. S1.** For EOD cases, the predominant serotypes were Ⅲ (48.6%, 18/37) and Ⅰa (32.4%, 12/37), followed by Ib (13.5%, 5/37) and Ⅴ (5.4%, 2/37). For LOD cases, the serotype III was the overwhelmingly predominant serotype (80.9%, 76/94), followed by Ⅰb (10.6%, 10/94) and Ⅰa (8.5%, 8/94) (**Fig. 1B**). Serotype Ⅲ was significantly associated with LOD (80.9%, 76/94; P<0.01), while Serotype Ⅰa was significantly associated with EOD (60.0%, 12/20; P<0.01). Meningitis cases were mainly caused by serotype Ⅲ (74.3%, 26/35) and serotype Ⅰb (22.9%, 8/35). A significant association was also observed between serotype Ⅰa and respiratory distress (61.5%, 8/13, P≤0.01) (**Fig. 3B)**.


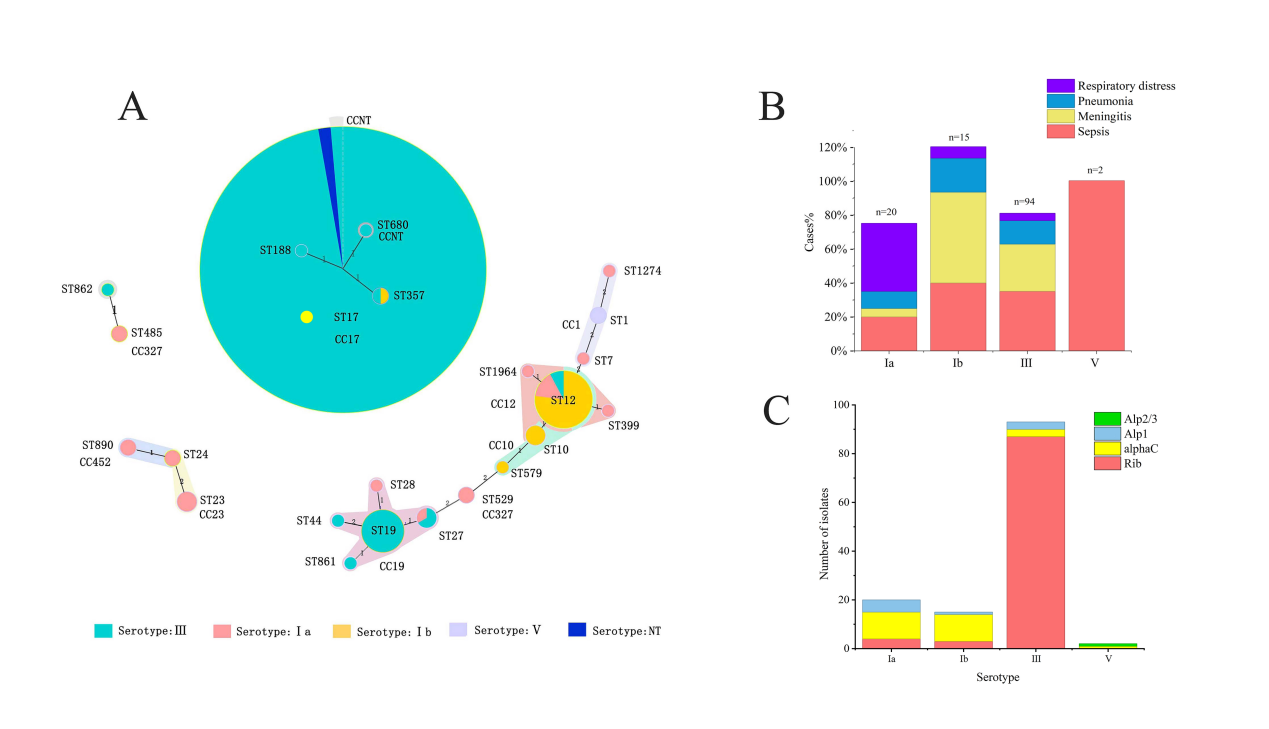


**Fig. 3.** (A) Minimum spanning tree of serotypes, ST types, and clonal complexes of 131 GBS isolates. Circles represent STs; the size of each circle indicates the number of isolates within the specific type. The ST with the greatest number of single-locus variants is the founder ST. GBS isolate serotypes appear as different colors; shading denotes STs belonging to the same CC. The digits 1, 2 are the goeBURST distance scores, given the Hamming distance between profiles. The greater the distance score between different ST types, the farther the genetic distance is. (B) Serotype-specific distribution patterns of infection types. (C) Serotype-specific distribution patterns of Alp family genes. GBS, Group B Streptococcus; CC, clonal complex; ST, sequence type.

**3.4 CCs and MLST of Invasive GBS Isolates**

A total of 23 distinct STs were identified among the 131 isolates, with ST17 being the most prevalent (56.5%, 74/131), followed by ST12 (9.9%, 13/131) and ST19 (6.9%, 9/131). All STs were clustered into eight CCs, with CC17 (58.0%, 76/131), CC19 (11.5%, 15/131), and CC12 (7.6%, 10/131) the most common (**Table 2)**. A minimum spanning tree illustrates the relationships between serotype, ST, and CC (**Fig. 3A**). The Ⅲ/ST17 combination accounted for 56.5% (74/131) of all isolates. Other notable genotype-serotype associations include Ⅲ/CC19 (9.9%, 13/131), Ib/ST12 (7.6%, 10/131), and Ib/CC10 (6.9%, 9/131).

**Table 2.** The correlation of GBS serotypes with MLST analysis in the GBS strains of infants with meningitis and in all isolates. ST, sequence type.

| Serotype (n, %) | STs in the GBS strains of infants with meningitis (n, %) | STs in all GBS strains (n, %) |
| --- | --- | --- |
| Ⅲ (94,) | ST17(22,16.79%), ST19(3,2.29%), ST188(1,0.76%) | ST17(74,56.49%), ST19(9,6.87%), ST27(2,1.53%), ST12(1,0.76%), ST44(1,0.76%), ST188(1,0.76%), ST357(1,0.76%), ST680(1,0.76%), ST861(1,0.76%), ST862(1,0.76%) |
| Ⅰa (20,) | ST12(1,0.76%) | ST23(3,2.29%), ST12(2,1.53%), ST24(2,1.53%), ST485(2,1.53%), ST529(2,1.53%), ST890(2,1.53%), ST27(1,0.76%), ST28(1,0.76%), ST399(1,0.76%), ST7(1,0.76%), ST1274(1,0.76%), ST1964(1,0.76%) |
| Ⅰb (15,) | ST12(4,3.05%), ST10(2,1.53%), ST357(1,0.76%), ST579(1,0.76%) | ST12(10,7.63%), ST10(3,2.29%), ST357(1,0.76%), ST579(1,0.76%) |
| Ⅴ (2,) |  | ST1(2,1.53%) |

**3.5 Virulence Gene Profile of Invasive GBS Isolates**

All 131 isolates were screened for the presence of *CylE*, *HylB*, Alp family genes, and pilus island genes (**Fig. S1**). Among the Alp family genes, *Rib* was the most prevalent (71.8%, 94/131), followed by *AlphaC* (19.8%, 26/131), *Alp1* (6.9%, 9/131), and *Alp2*/3 (0.8%, 1/131); *Alp4* was not detected in any isolate. Three isolates did not carry any Alp family genes, and two isolates harbored two Alp genes simultaneously. The *rib* gene was significantly associated with the Ⅲ/ST17 clone (74.5%, 70/94; P<0.01). *AlphaC* was primarily detected in serotype Ⅰa (42.3%, 11/26) and Ⅰb (42.3%, 11/26) isolates, and all serotype Ⅰb/CC10 isolates (n=9) exclusively carried *AlphaC* (**Fig. 3C**).

All isolates harbored at least one pilus island: *PI-2a* (32.1%, 42/131) or *PI-2b* (67.9%, 89/131). PI-1 was detected in 49.6% (n=65) of total isolates (**Table 3**). The distribution of pilus islands varied significantly across GBS serotypes and was strongly associated with specific CCs. Specifically, Ⅲ/CC17 strains exclusively carried either *PI-1*+*PI-2b* or *PI-2b* alone, whereas 76.9% (10/13) of Ⅲ/CC19 strains carried *PI-1* + *PI-2a*. The *PI-1*+*PI-2a* or *PI-2a* genotype was present in 80% of both serotype Ⅰa (16/20) and Ⅰb (12/15) isolates, as well as in both serotype V isolates (n = 2). The most prevalent virulence gene combination among all isolates was *PI-2b-cylE-hylB-rib* (35.1%, 46/131).

**Table 3.** Pilus island distribution grouped by serotype.

| Serotype | Pilus Island (n, %) | | | | Total(n) |
| --- | --- | --- | --- | --- | --- |
| PI-2a | PI-2b | PI-1+PI-2a | PI-1+PI-2b |
| Ia | 7, 5.3 | 3, 2.3 | 9, 6.9 | 1, 0.8 | 20, 15.3 |
| Ib | 3, 2.3 | 1, 0.8 | 9, 6.9 | 2, 1.5 | 15, 11.5 |
| Ⅲ | 1, 0.8 | 51, 38.9 | 11, 8.4 | 31, 23.7 | 94, 71.8 |
| Ⅴ | 0 | 0 | 2, 1.5 | 0 | 2, 1.5 |
| Total (n, %) | 11, 8.4 | 55, 42 | 31, 23.7 | 34, 26 | 131 |

1. **Discussion**

GBS remains a leading cause of sepsis and meningitis in newborns worldwide, with preterm infants at the highest risk. While IAP has proven effective in reducing the incidence of EOD, it is not fully protective, and rare cases of EOD still occur even in infants born to mothers who received guideline-recommended IAP [21]. Beyond antibiotic resistance, the biofilm-forming capacity of GBS has emerged as a critical factor contributing to IAP failure and to persistent maternal colonization [22].

Invasive GBS infections remain a significant clinical concern for infants at the study center, with a median of 12.5 cases (IQR: 6.5–19.25) recorded annually during 2013–2022. Consistent with data from Singapore [23], we observed a higher incidence of LOD than EOD in this study (**Table 1**), a pattern distinct from that reported in South Africa [24], probably due to differences in IAP implementation rates and clinical practices across countries [25]. The median age of EOD onset was 1 day (IQR: 1-1), consistent with vertical transmission from GBS-colonized mothers and associated obstetric risk factors, such as premature rupture of membranes and maternal fever [26]. In contrast, LOD typically presents with a subacute or insidious onset, with transmission routes including postnatal maternal contact (including potentially through breast milk), horizontal transmission from other household contacts, community sources, or nosocomial acquisition [27].

China issued the *Chinese Experts’ Consensus on Prevention of Perinatal GBS Disease* in August 2021 [28]. In this study, approximately 86.8% of pregnant women did not undergo GBS screening or had no documented screening results, and two-thirds of the available screening records were obtained after August 2021, highlighting the urgent necessity of promoting the standardized prenatal GBS screening and IAP implementation across healthcare institutions in China.

The distributions of GBS serotypes and STs vary significantly across geographic regions [29-31]. In this study, the Ⅲ/ST17 clone (56.5%) was the predominant lineage among infantile GBS isolates, a prevalence higher than the national average of 40.6% reported in China [28]. We confirmed a significant association between LOD and Ⅲ/ST17 (P<0.05), consistent with European studies that link CC17 to hypervirulence, neonatal meningitis, and an enhanced ability to penetrate the blood-brain barrier and evade host immune responses [32-34]. A notable epidemiological shift was observed between 2013-2017 and 2018-2022; the prevalence of serotype Ia increased from 2.7% to 33.3%, while serotype Ib declined concurrently from 20.0% to 0% (**Table 4**). This shift may be driven by the clonal expansion of fitter serotype Ia lineages, potentially facilitated by genetic events such as capsular switching [35]. Additionally, we identified a significant association between serotype Ia and respiratory distress/failure, consistent with previous studies in southern China linking serotype Ia to pneumonia [17], underscoring the clinical value of molecular serotyping for early risk stratification and targeted management of invasive GBS disease.

## Table 4. Differences in the distribution of disease onset, sex, and serotype during the period 2013-2017 and 2018-2022.

|  | 2013-2017（n=75） | 2018-2022（n=56） |
| --- | --- | --- |
| Disease onset (n, %) |  |  |
| EOD | 19（25.3） | 18（33.3） |
| LOD | 56（74.7） | 38（66.7） |
| Sex (n, %) |  |  |
| Male | 37（49.3） | 28（50.0） |
| Female | 38（50.7） | 28（50.0） |
| Serotype (n, %) |  |  |
| Ia | 2（2.7） | 18（32.1） |
| Ib | 15（20.0） | 0（0） |
| III | 56（74.6） | 38（67.9） |
| V | 2（2.7） | 0（0） |

All GBS isolates in this study remained fully susceptible to penicillin, ampicillin, and vancomycin, while resistance rates to erythromycin, clindamycin, and tetracycline each exceeded 80%. This susceptibility pattern was consistent with recent epidemiological data from mainland China, which reaffirmed penicillin as the first-line agent and reported a pooled erythromycin resistance rate of 65.4%, with geographically variable clindamycin resistance (exceeding 70% in northeast China) [36]. The high prevalence of macrolide and lincosamide resistance is a well-documented regional and global trend [37], driven primarily by two major molecular mechanisms: ribosomal target modification mediated by *erm* genes (e.g., *ermB*), which confers the MLSB phenotype and inducible clindamycin resistance (detectable by the D-test); and efflux-mediated resistance by *mefA*/*E* genes, leading to the M phenotype [36, 37]. Tetracycline resistance was similarly prevalent (>80% nationally, 75.1% pooled), mainly due to the widespread dissemination of ribosomal protection genes such as *tetM* and *tetO* [36, 37]. We observed multidrug resistance (MDR) in 66.7% (10/15) of fluoroquinolone-resistant isolates, with this phenotype being particularly prevalent in the III/ST19 lineages (50%, 5/10); among these, 80% (4/5) exhibited co‑resistance to fluoroquinolones (ciprofloxacin, levofloxacin, and moxifloxacin) and lincosamides, macrolides, or tetracyclines. The underlying mechanisms may involve mutations in fluoroquinolone target genes and the carriage of resistance clusters such as *lnu(B)*, which could be disseminated via integrative and conjugative elements (ICEs) or transposons [19, 38].

Vertical transmission is the primary driver of EOD, occurring through ascending intrauterine infection or intrapartum exposure, and also represents a significant reservoir for LOD [39, 40]. The *HylB* (hyaluronidase) and *CylE* (hemolysin) genes are two key virulence determinants that enable GBS to cross the placental barrier and establish neonatal infection [41, 42]. The *CylE* gene, located within the *Cyl* operon, was originally thought to encode the β-hemolysin/cytolysin toxin but is now recognized as an acyl‑CoA acyltransferase that catalyzes a critical step in the biosynthesis of the hemolytic glycolipid ornithine rhamnolipid; deletion of *CylE* abrogates toxin production and results in a non‑hemolytic phenotype [43, 44]. The *HylB* gene encodes a secreted hyaluronate lyase that degrades hyaluronic acid in the extracellular matrix, thereby disrupting tissue integrity and facilitating bacterial dissemination. This activity has been implicated in ascending uterine infection and adverse pregnancy outcomes, including preterm birth, stillbirth, and fetal injury [41]. In this study, both *CylE* and *HylB* were detected in all isolates (100%), consistent with reports from Fuzhou, China [45], and the Argentine Pampa region [46]. Given their universal presence and critical role in GBS pathogenesis, the development of inhibitors targeting *CylE* or *HylB* function could offer a promising complementary strategy to conventional IAP for reducing EOD incidence.

Despite the implementation of IAP, EOD cases still occur worldwide [47], a phenomenon potentially attributed to biofilm formation in GBS-colonized mothers. Pilus islands (*PI-1*, *PI-2a*, *PI-2b*) encode GBS pili, which are critical for biofilm formation and virulence [48]. Consistent with previous reports from China [49, 50], *PI-2b* was universally detected (100%) in III/ST17 isolates in our study and has been shown to enhance macrophage internalization and intracellular survival [51]. *PI-2a*, a key factor associated with biofilm formation in chronic infections and antibiotic resistance [52], was carried by over 75% of non-Ⅲ/ ST17 isolates (72.7% in Ⅲ/ST19; 80% in serotype Ia; 80% in serotype Ib) (**Table 3 and Fig. S1**). Notably, the Ⅲ/ST17 lineage exhibits the strongest biofilm-forming capacity among GBS clones, followed by serotype V strains [53]. Biofilm formation in ST17 is independent of pilus island genes and instead relies on capsular polysaccharides, biofilm regulatory proteins, and CsrR-mediated regulation of the adhesin *BapB* [54]. In our study, one infant developed EOD despite the mother receiving IAP; the infecting isolate was a serotype III/CC19 strain harboring *PI-2a* and *PI-1* and was fully susceptible to penicillin, clindamycin, and other relevant antibiotics. The mechanism underlying this IAP failure requires further investigation, with biofilm formation representing a potential contributing factor.

Vaccine development remains a key priority for the prevention and control of LOD, although no GBS vaccine is currently commercially available. Therefore, investigations into surface protein genes (including the Alp family) remain essential for guiding the development of an effective GBS vaccine to reduce infantile GBS infections, particularly LOD, worldwide. In our study, the *Rib* gene was the most prevalent Alp family gene (71.8%, 94/131) and was strongly associated with serotype Ⅲ. The role of *Rib* in endothelial adhesion, together with the high prevalence of Ⅲ/ST17 in meningitis cases, suggests its potential neurotropic role [55]. *AlphaC* and *Rib* are highly immunogenic antigens; animal studies have demonstrated that immunization with these proteins elicits protective immunity against lethal GBS challenge. A hexavalent capsular polysaccharide-conjugate vaccine targeting serotypes Ia, Ib, and Ⅱ-Ⅴ currently under clinical evaluation [56], would cover 100% of the strains in this study. In contrast, Alp family protein-based vaccines (e.g., *AlphaC*, *Rib*, *Alp1*, and *Alp2/3*) could offer broader, serotype-independent protection [57] and would cover 97.7% of our isolates. Beyond vaccine development, novel strategies, including the integration of clinical data and molecular data to establish predictive models for identifying highest-risk neonates and the development of biofilm-inhibition agents, may further reduce the clinical burden of GBS infections, especially LOD.

**Conclusion**

Invasive GBS infections in infants aged ≤90 days in Guangzhou are predominantly driven by the hypervirulent Ⅲ/ST17 clone, and serotype Ia is specifically associated with respiratory distress in EOD cases. No significant shifts in antimicrobial resistance patterns were observed over the 10-year study period, confirming that penicillin and ampicillin remain the optimal agents for GBS prophylaxis and treatment. Our findings highlight the urgent need to promote widespread implementation of prenatal GBS screening and IAP across healthcare institutions in China. Furthermore, given the occurrence of IAP failure due to factors such as biofilm formation, accelerated vaccine development and novel non-vaccine approaches—including anti-biofilm agents or monoclonal antibodies targeting key virulence mechanisms—are warranted to further prevent and control invasive GBS disease in infants.

**Research Ethics**

This study was conducted in accordance with the Declaration of Helsinki and approved by the Ethics Committee of Guangzhou Medical University Affiliated Women and Children’s Medical Center, Guangzhou, China (Approval No. 2016050405 for the study period 2013-2017; Approval No. 2025120A01 for all retrospective GBS strains in this study). The study is a retrospective, observational, and non-interventional research on invasive *Streptococcus agalactiae* infections in infants, and the ethics review committee formally waived the requirement for written informed consent for all included bacterial isolates and clinical data. All data were fully anonymized and de-identified to safeguard the privacy of infant participants. In addition, the hospital’s outpatient registration system has supplementary informed consent items for guardians to agree that the diagnosis and treatment data are used for scientific research and whether to agree that the remaining samples after inspection are used for medical research, which further ensures the ethical compliance of the study.

**Author Contributions**

Lianfen Huang designed the experiments. Xiaolan Chen, Wenshan Chen, LiJia Wei, Kankan Gao, Lianfen Huang performed the experiments. Lianfen Huang, Huamin Zhong, Yongqiang Xie, Kankan Gao, Bingshao Liang, Yunfeng Liu, Fei Gao, Yan Long collected/provided the clinical samples and information. Xiaolan Chen, Lianfen Huang, Wenshan Chen, LiJia Wei wrote and edited the manuscript with input from all of the other authors. All authors contributed to the article and approved the submitted version.

**Funding**

The author(s) declare that ﬁnancial support was received for the research, authorship, and/or publication of this article. This work was supported by grants from the Natural Science Foundation of Guangdong Province, China (2026A1515012832); and Guangzhou Science, Technology and Innovation Commission and Guangzhou Children and Women Medical Center (2023A03J0927), and Guangdong Provincial Clinical Research Center for Laboratory Medicine(2023B110008).

**Conflict Of Interest**

The authors declare no commercial or financial relationships that could be construed as a potential conflict of interest.

**Consent for publication**

Not applicable, as the manuscript contains no individual person’s data (e.g., images, videos, or personal details) that would require consent for publication.

**References**

1. Nanduri, S.A., et al., Epidemiology of Invasive Early-Onset and Late-Onset Group B Streptococcal Disease in the United States, 2006 to 2015: Multistate Laboratory and Population-Based Surveillance. JAMA Pediatr, 2019. **173**(3): p. 224-233.

2. Ji, W., et al., Clinical and Molecular Epidemiology of Invasive Group B *Streptococcus* Diseaseamong Infants, China. Emerging Infectious Diseases, 2019. **25**(11): p. 2021-2030.

3. Alotaibi, N.M., et al., Clinical Characteristics and Treatment Strategies for Group B *Streptococcus* (GBS) Infection in Pediatrics: A Systematic Review. Medicina (Kaunas), 2023. **59**(7).

4. Liu, Y. and J. Liu, Group B *Streptococcus*: Virulence Factors and Pathogenic Mechanism. Microorganisms, 2022. **10**(12).

5. Alvim, D., et al., Biofilm production and distribution of pilus variants among *Streptococcus agalactiae* isolated from human and animal sources. Biofouling, 2019. **35**(8): p. 938-944.

6. Pawlowski, A., et al., A group B *Streptococcus* alpha-like protein subunit vaccine induces functionally active antibodies in humans targeting homotypic and heterotypic strains. Cell Rep Med, 2022. **3**(2): p. 100511.

7. Randis, T.M., et al., Group B *Streptococcus* β-hemolysin/cytolysin breaches maternal-fetal barriers to cause preterm birth and intrauterine fetal demise in vivo. J Infect Dis, 2014. **210**(2): p. 265-73.

8. Vornhagen, J., et al., Bacterial Hyaluronidase Promotes Ascending GBS Infection and Preterm Birth. mBio, 2016. **7**(3).

9. Kong, F., et al., Serotype identification of group B *streptococci* by PCR and sequencing. J Clin Microbiol, 2002. **40**(1): p. 216-26.

10. Poyart, C., et al., Multiplex PCR assay for rapid and accurate capsular typing of group B *streptococci*. J Clin Microbiol, 2007. **45**(6): p. 1985-8.

11. Imperi, M., et al., A multiplex PCR assay for the direct identification of the capsular type (Ia to IX) of *Streptococcus agalactiae*. J Microbiol Methods, 2010. **80**(2): p. 212-4.

12. Jones, N., et al., Multilocus sequence typing system for group B *streptococcus*. J Clin Microbiol, 2003. **41**(6): p. 2530-6.

13. Gori, A., et al., Pan-GWAS of *Streptococcus agalactiae* Highlights Lineage-Specific Genes Associated with Virulence and Niche Adaptation. mBio, 2020. **11**(3).

14. Hsu, J.F., et al., The Clinical and Genetic Characteristics of *Streptococcus agalactiae* Meningitis in Neonates. Int J Mol Sci, 2023. **24**(20).

15. Li, J., et al., Molecular characteristics of group B *Streptococcus* isolates from infants in southern mainland China. BMC Infectious Diseases, 2019. **19**(1).

16. Wang, X., et al., Phenotypic and molecular characterization of *Streptococcus agalactiae* colonized in Chinese pregnant women: predominance of ST19/III and ST17/III. Res Microbiol, 2018. **169**(2): p. 101-107.

17. Zhu, Y., et al., Etiological serotype and genotype distributions and clinical characteristics of group B *streptococcus*-inducing invasive disease among infants in South China. BMC Pediatr, 2020. **20**(1): p. 146.

18. Arias, B., et al., Fluoroquinolone-Resistant *Streptococcus agalactiae* Invasive Isolates Recovered in Argentina. Microb Drug Resist, 2019. **25**(5): p. 739-743.

19. Gao, K., et al., Predominance of III/ST19 and Ib/ST10 Lineages with High Multidrug Resistance in Fluoroquinolone-Resistant Group B Streptococci Isolates in Which a New Integrative and Conjugative Element Was Identified. Frontiers in Microbiology, 2021. **11**.

20. Zhang, L., et al., Emergence of Invasive Serotype Ib Sequence Type 10 Group B *Streptococcus* Disease in Chinese Infants Is Driven by a Tetracycline-Sensitive Clone. Front Cell Infect Microbiol, 2021. **11**: p. 642455.

21. Blaschke, A.J., et al., Clindamycin-resistant group B *Streptococcus* and failure of intrapartum prophylaxis to prevent early-onset disease. J Pediatr, 2010. **156**(3): p. 501-3.

22. Pell, M.E., et al., Genomic adaptation in group B *Streptococcus* following intrapartum antibiotic prophylaxis and childbirth. bioRxiv, 2025.

23. Kam, K.Q., et al., Serotype distribution and incidence of invasive early onset and late onset group B streptococcal disease amongst infants in Singapore. BMC Infect Dis, 2021. **21**(1): p. 1221.

24. Dangor, Z., et al., Temporal Changes in Invasive Group B *Streptococcus* Serotypes: Implications for Vaccine Development. PLoS One, 2016. **11**(12): p. e0169101.

25. Verani, J.R., L. McGee, and S.J. Schrag, Prevention of perinatal group B streptococcal disease--revised guidelines from CDC, 2010. MMWR Recomm Rep, 2010. **59**(Rr-10): p. 1-36.

26. Oddie, S. and N.D. Embleton, Risk factors for early onset neonatal group B streptococcal sepsis: case-control study. Bmj, 2002. **325**(7359): p. 308.

27. Hon, K.L., et al., Late-onset group B streptococcal disease is a rare but devastating disease. Hong Kong Med J, 2021. **27**(3): p. 229-230.

28. Chinese Medical Association. Chinese Experts consensus on prevention of perinatal Group B Streptococcal disease. Chin J Perinat, 2021. Med 24:561-566.

29. Tsai, M.H., et al., Molecular Characteristics and Antimicrobial Resistance of Group B *Streptococcus* Strains Causing Invasive Disease in Neonates and Adults. Front Microbiol, 2019. **10**: p. 264.

30. Meehan, M., et al., Genomic epidemiology of group B streptococci spanning 10 years in an Irish maternity hospital, 2008-2017. J Infect, 2021. **83**(1): p. 37-45.

31. Alzayer, M., et al., Genomic insights into the diversity, virulence, and antimicrobial resistance of group B *Streptococcus* clinical isolates from Saudi Arabia. Front Cell Infect Microbiol, 2024. **14**: p. 1377993.

32. Romain, A.S., et al., Clinical and Laboratory Features of Group B *Streptococcus* Meningitis in Infants and Newborns: Study of 848 Cases in France, 2001-2014. Clin Infect Dis, 2018. **66**(6): p. 857-864.

33. Tazi, A., et al., Risk Factors for Infant Colonization by Hypervirulent CC17 Group B *Streptococcus*: Toward the Understanding of Late-onset Disease. Clin Infect Dis, 2019. **69**(10): p. 1740-1748.

34. Deshayes de Cambronne, R., et al., CC17 group B *Streptococcus* exploits integrins for neonatal meningitis development. J Clin Invest, 2021. **131**(5).

35. Khan, U.B., et al., Identifying large-scale recombination and capsular switching events in *Streptococcus agalactiae* strains causing disease in adults in the UK between 2014 and 2015. Microb Genom, 2022. **8**(3).

36. Guo, D., et al., Neonatal colonization of group B *Streptococcus* in China: Prevalence, antimicrobial resistance, serotypes, and molecular characterization. Am J Infect Control, 2018. **46**(3): p. e19-e24.

37. Hayes, K., F. O’Halloran, and L. Cotter, A review of antibiotic resistance in Group B *Streptococcus*: the story so far. Critical Reviews in Microbiology, 2020. **46**(3): p. 253-269.

38. Zhou, K., et al., New genetic context of lnu(B) composed of two multi-resistance gene clusters in clinical *Streptococcus agalactiae* ST-19 strains. Antimicrob Resist Infect Control, 2019. **8**: p. 117.

39. Tavares, T., L. Pinho, and E. Bonifácio Andrade, Group B Streptococcal Neonatal Meningitis. Clin Microbiol Rev, 2022. **35**(2): p. e0007921.

40. Berardi, A., et al., Understanding Factors in Group B *Streptococcus* Late-Onset Disease. Infect Drug Resist, 2021. **14**: p. 3207-3218.

41. Coleman, M., et al., Hyaluronidase Impairs Neutrophil Function and Promotes Group B *Streptococcus* Invasion and Preterm Labor in Nonhuman Primates. mBio, 2021. **12**(1).

42. Yang, R., et al., Blood-Brain Barrier Integrity Damage in Bacterial Meningitis: The Underlying Link, Mechanisms, and Therapeutic Targets. Int J Mol Sci, 2023. **24**(3).

43. Liu, G.Y., et al., Sword and shield: linked group B streptococcal beta-hemolysin/cytolysin and carotenoid pigment function to subvert host phagocyte defense. Proc Natl Acad Sci U S A, 2004. **101**(40): p. 14491-6.

44. Rosa-Fraile, M., S. Dramsi, and B. Spellerberg, Group B streptococcal haemolysin and pigment, a tale of twins. FEMS Microbiol Rev, 2014. **38**(5): p. 932-46.

45. Liang, B., et al., Molecular Epidemiology of Group B *Streptococcus* Isolates from Pregnant Women with Premature Rupture of Membranes in Fuzhou, China. Infect Drug Resist, 2023. **16**: p. 269-278.

46. Hernandez, L.B., et al., Virulence Profiles and Antimicrobial Resistance of *Streptococcus agalactiae* Infective and Colonizing Strains from Argentina. Current Microbiology, 2022. **79**(12): p. 392.

47. Le Doare, K., et al., Intrapartum Antibiotic Chemoprophylaxis Policies for the Prevention of Group B *Streptococcal* Disease Worldwide: Systematic Review. Clinical Infectious Diseases, 2017. **65**(suppl_2): p. S143-S151.

48. Rosini, R., et al., Identification of novel genomic islands coding for antigenic pilus-like structures in *Streptococcus agalactiae*. Mol Microbiol, 2006. **61**(1): p. 126-41.

49. Lu, B., et al., Microbiological and clinical characteristics of Group B *Streptococcus* isolatescausing materno-neonatal infections: high prevalence of CC17/*PI-1* and *PI-2b* sublineage in neonatal infections. Journal of Medical Microbiology, 2018. **67**(11): p. 1551-1559.

50. Zhang, L., et al., Molecular characterization of pathogenic group B *streptococcus* from a tertiary hospital in Shanxi, China: High incidence of sequence type 10 strains in infants/pregnant women. J Microbiol Immunol Infect, 2021. **54**(6): p. 1094-1100.

51. Périchon, B., et al., Insights into *Streptococcus agalactiae* PI-2b pilus biosynthesis and role in adherence to host cells. Microbes Infect, 2019. **21**(2): p. 99-103.

52. Rinaudo, C.D., et al., Specific Involvement of Pilus Type 2a in Biofilm Formation in Group B *Streptococcus*. PLOS ONE, 2010. **5**(2): p. e9216.

53. D'Urzo, N., et al., Acidic pH Strongly Enhances <i>In Vitro</i> Biofilm Formation by a Subset of Hypervirulent ST-17 *Streptococcus agalactiae* Strains. Applied and Environmental Microbiology, 2014. **80**(7): p. 2176-2185.

54. Li, W., et al., CsrR modulates biofilm formation of ST-17 GBS through the regulation of a novel adhesion factor, BapB. Microb Pathog, 2025. **207**: p. 107873.

55. Pawlowski, A., et al., A group B *Streptococcus* alpha-like protein subunit vaccine induces functionally active antibodies in humans targeting homotypic and heterotypic strains. Cell Reports Medicine, 2022. **3**(2): p. 100511.

56. Absalon, J., et al., Safety and immunogenicity of a novel hexavalent group B *streptococcus* conjugate vaccine in healthy, non-pregnant adults: a phase 1/2, randomised, placebo-controlled, observer-blinded, dose-escalation trial. Lancet Infect Dis, 2021. **21**(2): p. 263-274.

57. Gonzalez-Miro, M., et al., Safety and immunogenicity of the group B *streptococcus* vaccine AlpN in a placebo-controlled double-blind phase 1 trial. iScience, 2023. **26**(3): p. 106261.
