# Supplementary material
Source: Research Square preprint supplement (doi:10.21203/rs.3.rs-8987163/v1)
Supplement: Supplementary file 3 [file 433873f83699c48420058838.docx]

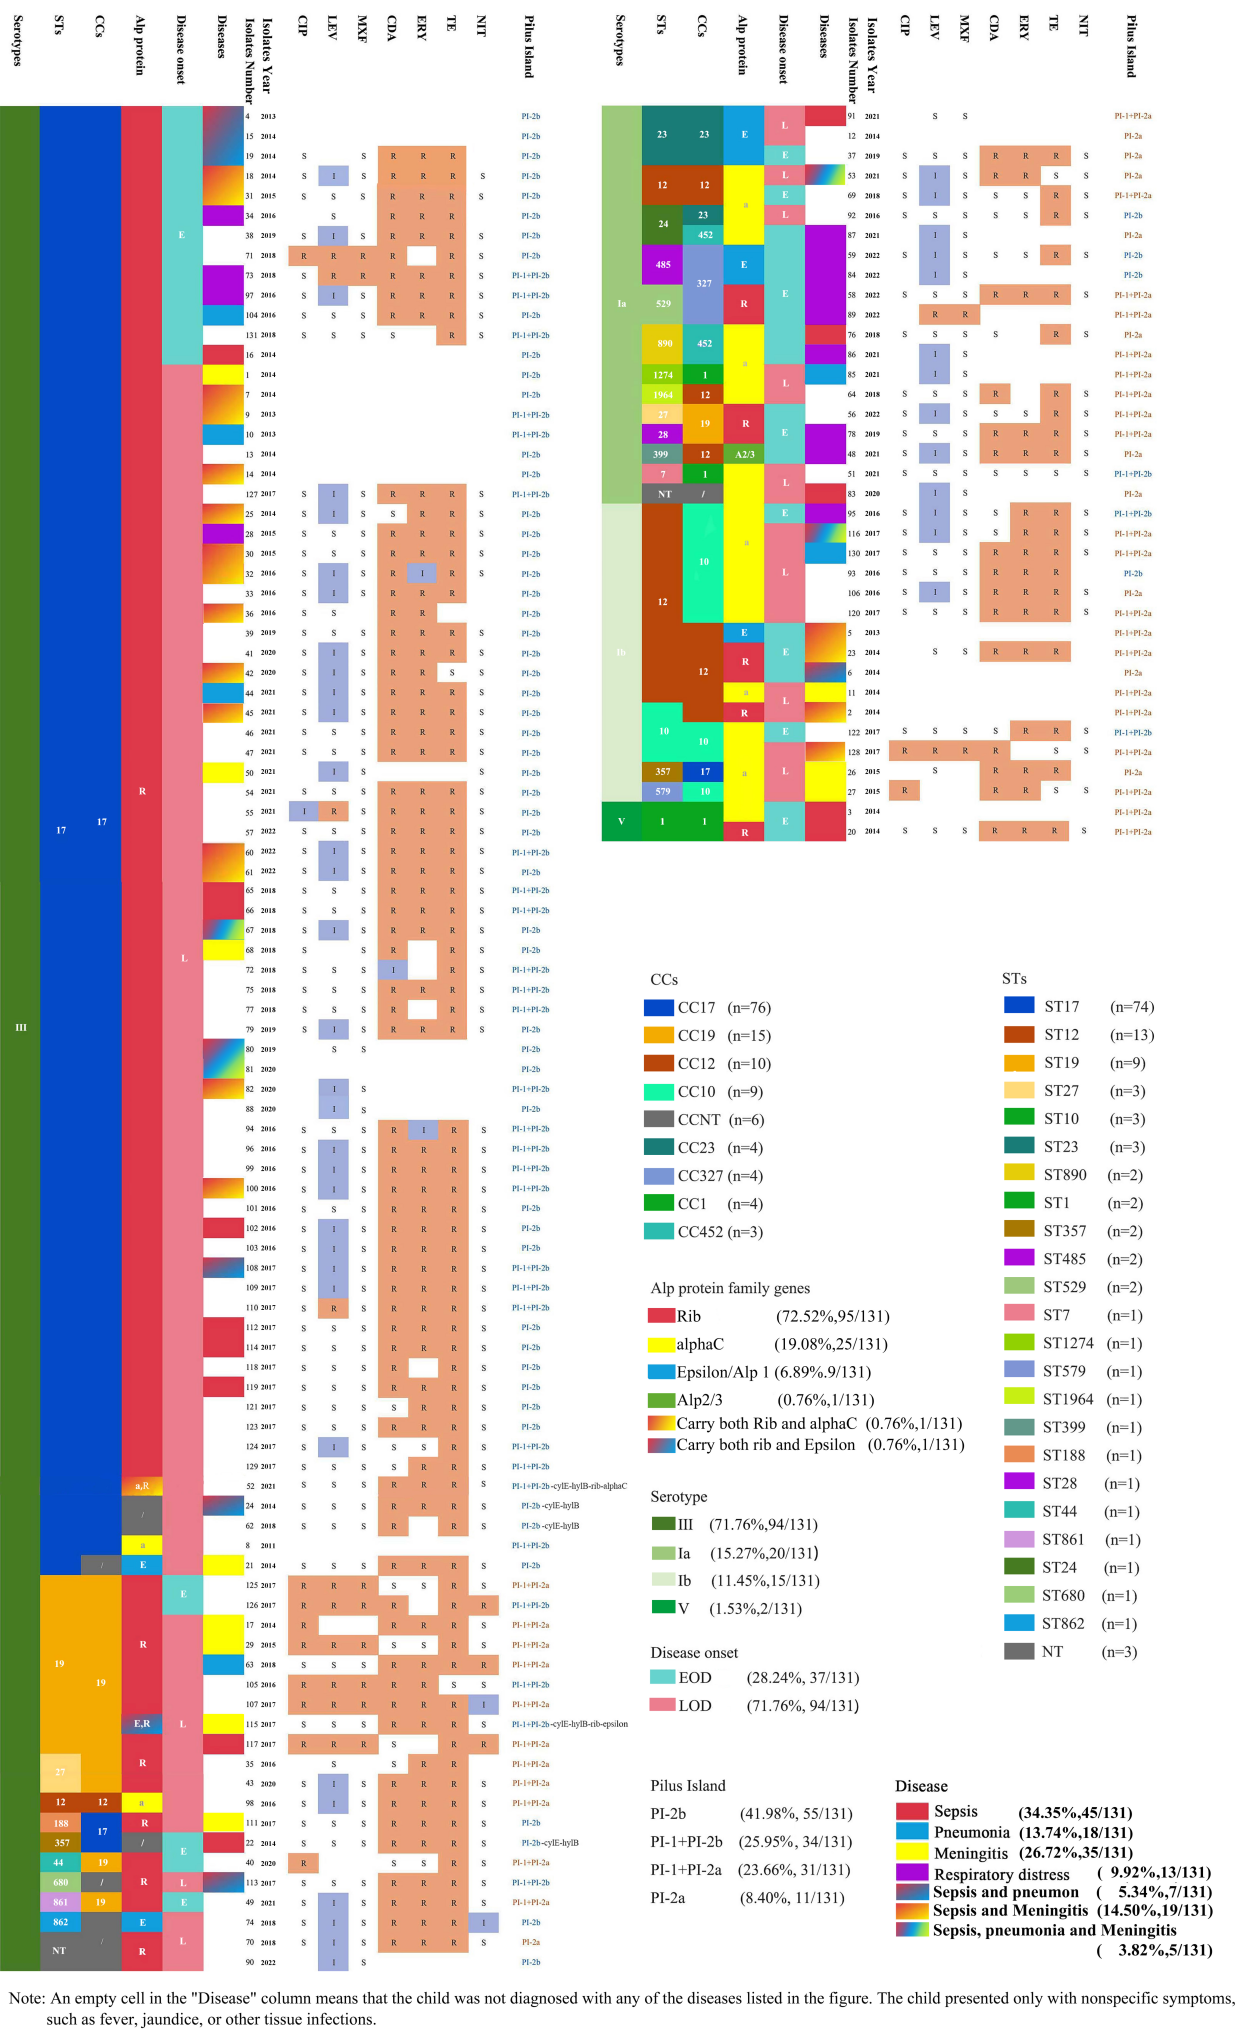
**Figure S1.** The distribution characteristics of 131 GBS strains are analyzed. Different colors are used to differentiate various phenotypes within the same category. From left to right, each column sequentially represents serotype, sequence type (ST), clonal complex (CC), ALP protein family genes, disease onset time, associated diseases, strain count, isolates year, antibiotic susceptibility results, and pilus islands.

GBS, Group B Streptococcus; EOD, early-onset disease; LOD, late-onset disease.

**Table S1.**Summary table of resistance profiles for seven antibiotics with incomplete susceptibility (2014-2022).

|  |  | **CIP** | **LEV** | **MXF** | **CLD** | **ERY** | **TET** | **NIT** |
| --- | --- | --- | --- | --- | --- | --- | --- | --- |
| **2014** | n | 8 | 7 | 8 | 9 | 9 | 9 | 7 |
| R (n,%) | 1 (12.5) | 0 | 0 | 8 (88.9) | 9 (100) | 9 (100) | 0 |
| I (n,%) | 0 | 2 (28.6) | 0 | 0 | 0 | 0 | 0 |
| **2015** | n | 5 | 5 | 4 | 6 | 6 | 6 | 5 |
| R (n,%) | 2 (40.0) | 1 (20.0) | 1(25.0) | 5 (83.3) | 5 (83.3) | 5 (83.3) | 0 |
| I (n,%) | 0 | 0 | 0 | 0 | 0 | 0 | 0 |
| **2016** | n | 18 | 20 | 17 | 20 | 20 | 19 | 15 |
| R (n,%) | 1 (5.6) | 1 (5.0) | 1 (5.9) | 17 (85.0) | 17 (85.0) | 18 (94.7) | 0 |
| I (n,%) | 0 | 11 (57.9) | 0 | 0 | 2 (18.2) | 0 | 0 |
| **2017** | n | 24 | 24 | 24 | 24 | 20 | 24 | 24 |
| R (n,%) | 5 (20.8) | 6 (25.0) | 5 (20.8) | 17 (70.8) | 18 (90.0) | 23 (95.8) | 2 (8.3) |
| I (n,%) | 0 | 5 (20.8) | 0 | 0 | 0 | 0 | 1 (4.2) |
| **2018** | n | 17 | 16 | 17 | 17 | 9 | 17 | 17 |
| R (n,%) | 1 (5.9) | 2 (12.5) | 2 (11.8) | 13 (76.5) | 8 (88.9) | 17 (100) | 1 (5.9) |
| I (n,%) | 0 | 4 (25.0) | 0 | 1 (5.9) | 0 | 0 | 1 (5.9) |
| **2019** | n | 5 | 6 | 6 | 5 | 5 | 5 | 5 |
| R (n,%) | 0 | 0 | 0 | 5 (100) | 5 (100) | 5 (100) | 0 |
| I (n,%) | 0 | 2 (33.3) | 0 | 0 | 0 | 0 | 0 |
| **2020** | n | 4 | 6 | 6 | 4 | 4 | 4 | 4 |
| R (n,%) | 1 (25.0) | 0 | 0 | 3 (75.0) | 3 (75.0) | 3 (75.0) | 0 |
| I (n,%) | 0 | 6 (100) | 0 | 0 | 0 | 0 | 0 |
| **2021** | n | 11 | 16 | 16 | 11 | 11 | 11 | 11 |
| R (n,%) | 0 | 1 (6.25) | 0 | 10 (90.9) | 10 (90.9) | 9 (81.2) | 0 |
| I (n,%) | 0 | 9 (56.3) | 0 | 0 | 0 | 0 | 0 |
| **2022** | n | 6 | 9 | 9 | 6 | 6 | 6 | 6 |
| R (n,%) | 0 | 1 (11.1) | 1 (11.1) | 4 (66.7) | 4 (66.7) | 6 (100) | 0 |
| I (n,%) | 0 | 6 (66.7) | 0 | 0 | 0 | 0 | 0 |
| **2014-2022** | n | 98 | 109 | 107 | 102 | 90 | 101 | 94 |
| R (n,%) | 11 (11.2) | 12 (11.0) | 10 (9.3) | 82 (80.4) | 79 (87.7) | 95 (94.1) | 3 (3.2) |
| I (n,%) | 0 | 45 (41.3) | 0 | 1 (1.0) | 2 (2.2) | 0 | 2 (2.1) |

R, resistance rate; I, intermediate rate; n, number；CIP, ciprofloxacin; LEV, levofloxacin; MXF, moxifloxacin; CLD, clindamycin; ERY, erythromycin; TET, tetracycline; NIT, nitrofurantoin.
